# Supplementary material for: C-GEM (v 1.0): a new, cost-efficient biogeochemical model for estuaries and its application to a funnel-shaped system
Source: Copernicus journal article supplement (doi:10.5194/gmd-7-1271-2014), 2014-07-04
Supplement: Supplementary file 2 [file gmd-7-1271-2014-supplement.zip]

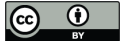

## *Supplement of*

# **C-GEM (v 1.0): a new, cost-efficient biogeochemical model for estuaries and its application to a funnel-shaped system**

**C. Volta et al.**

*Correspondence to:* C. Volta (cvolta@ulb.ac.be)

- Supplement-Cover-Letter.pdf
- C-GEM
  - code
    - \* biogeo.c
    - \* define.h
    - \* file.c
    - \* fun.c
    - \* hyd.c
    - \* init.c
    - \* main.c
    - \* schemes.c
    - \* sed.c
    - \* transport.c
    - \* tridag.c
    - \* uphyd.c
    - \* variables.h
  - model
    - \* C-GEM.cbp
- ReadMe.pdf
